# Supplementary material for: Electrochemical biosensing based on folic acid-triazine-grafted reduced graphene oxide: a highly selective breast cancer cell sensor
Source: Royal Society of Chemistry journal article supplement (doi:10.1039/d3ay00946g), 2023-01-01
Supplement: d3ay00946g1.pdf [file d3ay00946g1.pdf]

## Electronic supplementary information

### Electrochemical biosensing based on folic acid-triazine-grafted reduced graphene oxide: a highly selective breast cancer cells sensor

Abdollah Yari,<sup>\*a</sup> Foroozan Shokri <sup>a</sup>

<sup>a</sup>*Faculty of Chemistry, Lorestan University 68151-44316, Khorramabad, Iran.*

\*Corresponding author. Tel/Fax +986633120612, Email a.yari@ymail.com or yari.a@lu.ac.ir

#### Contents

**Fig. S1.** The SEM images of the surface of GCE, RGOTrz, FA and FA-RGOTrz, at two different scales of 2 mm (upper row) and 500 nm (lower row).

**Fig. S2.** The EDX patterns for RGOTrz, FA and FA-RGOTrz including the corresponding elemental content tables (insets).

**Fig. S3.** XRD analysis of dried RGOTrz, FA and FA-RGOTrz.

**Fig. S4.** Absorbance spectra of FA (a), RGOTrz (b) and FA-RGOTrz (c) in water.

**Fig. S5.** FT-IR spectra of RGOTrz (A), FA (B) and FA-RGOTrz (C).

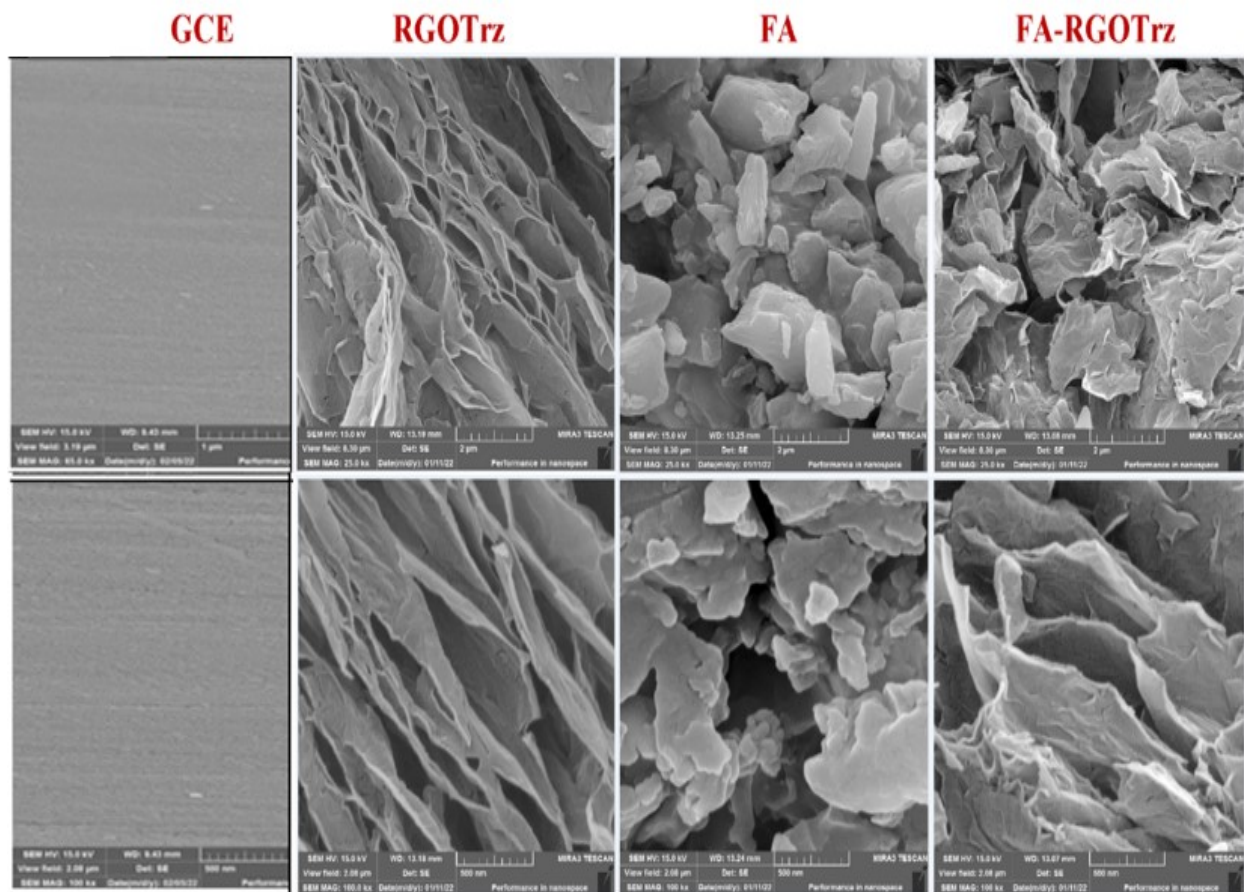

**Fig. S1.** The SEM images of the surface of GCE, RGOTrz, FA and FA-RGOTrz, at two different scales of 2 μm (upper row) and 500 nm (lower row).

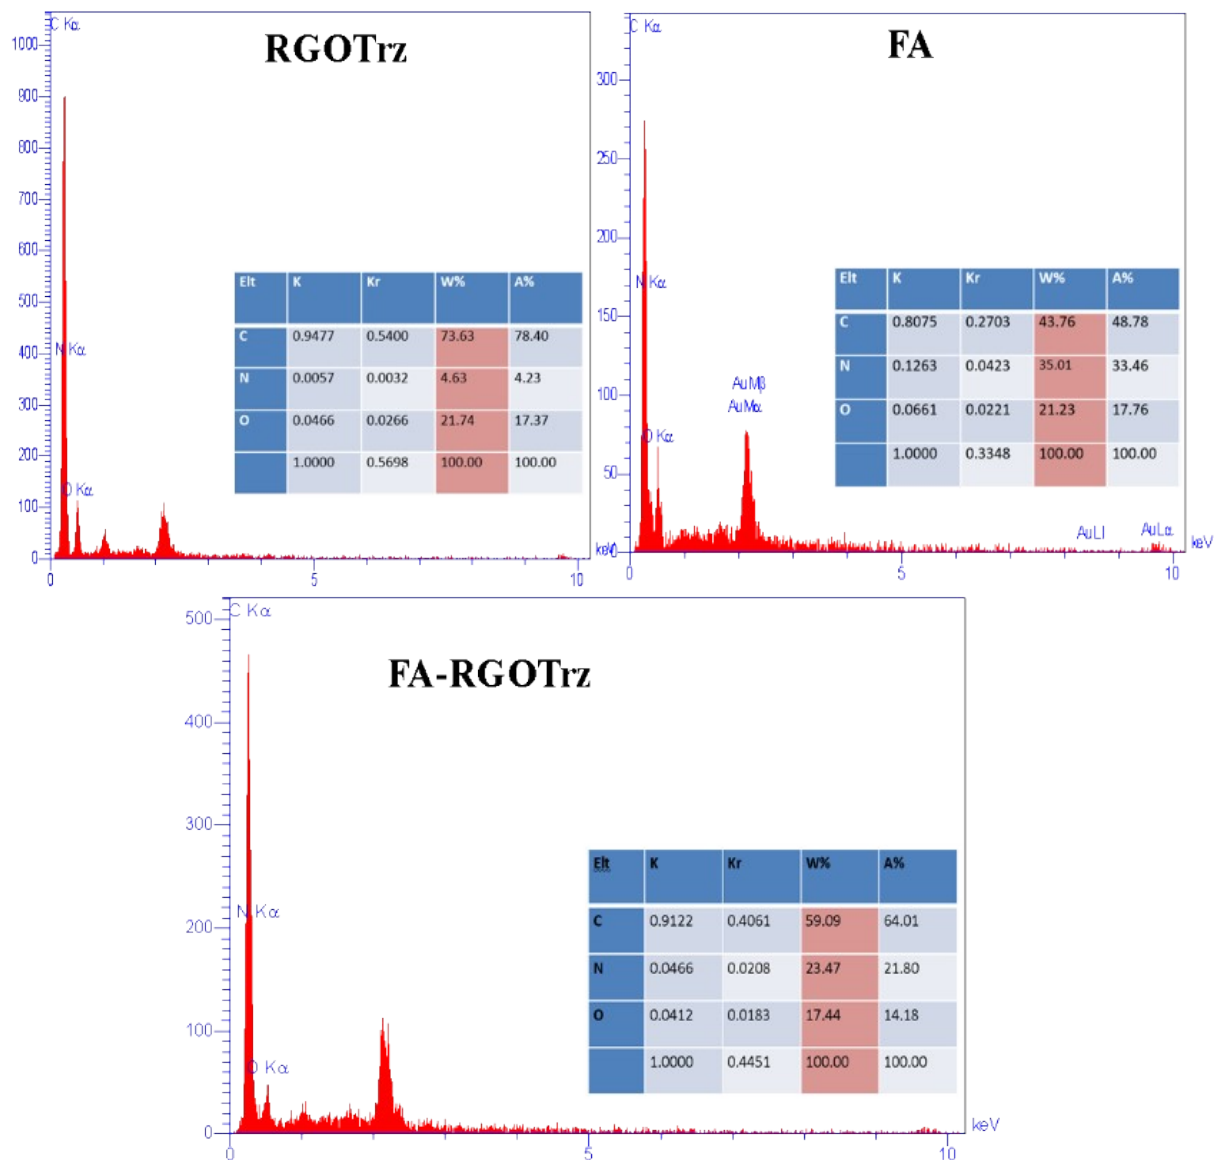

**Fig. S2.** The EDX patterns for RGOTrz, FA and FA-RGOTrz including the corresponding elemental content tables (insets).

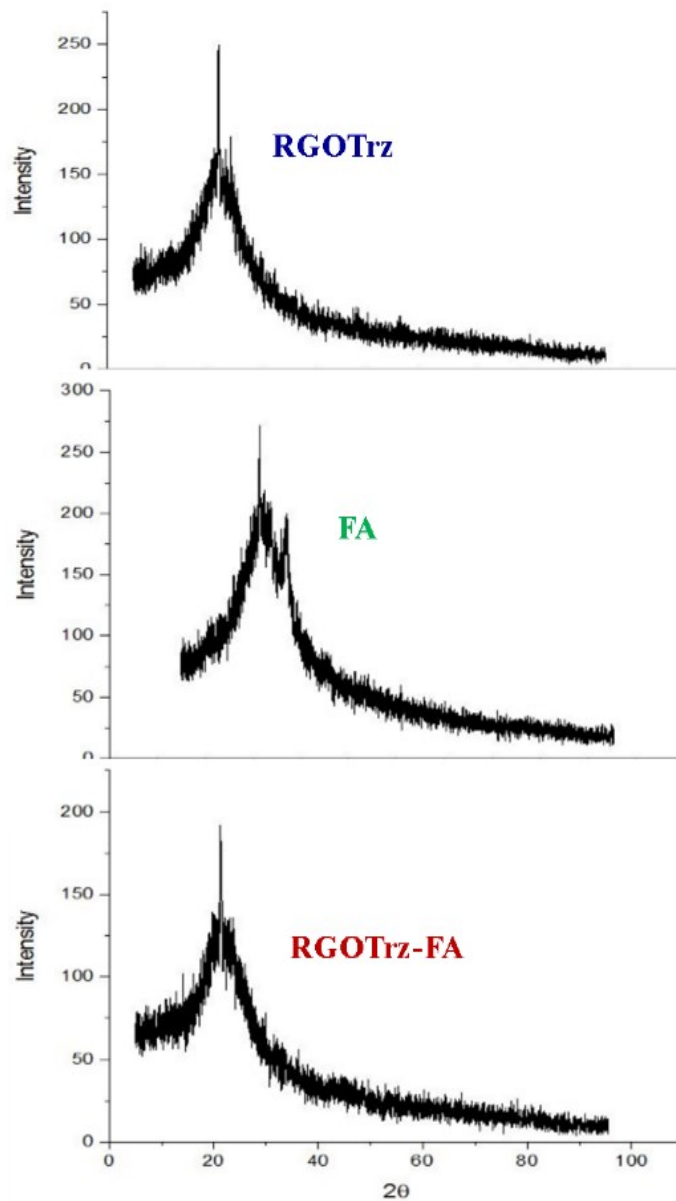

**Fig. S3.** XRD analysis of dried RGOTrz, FA and FA-RGOTrz.

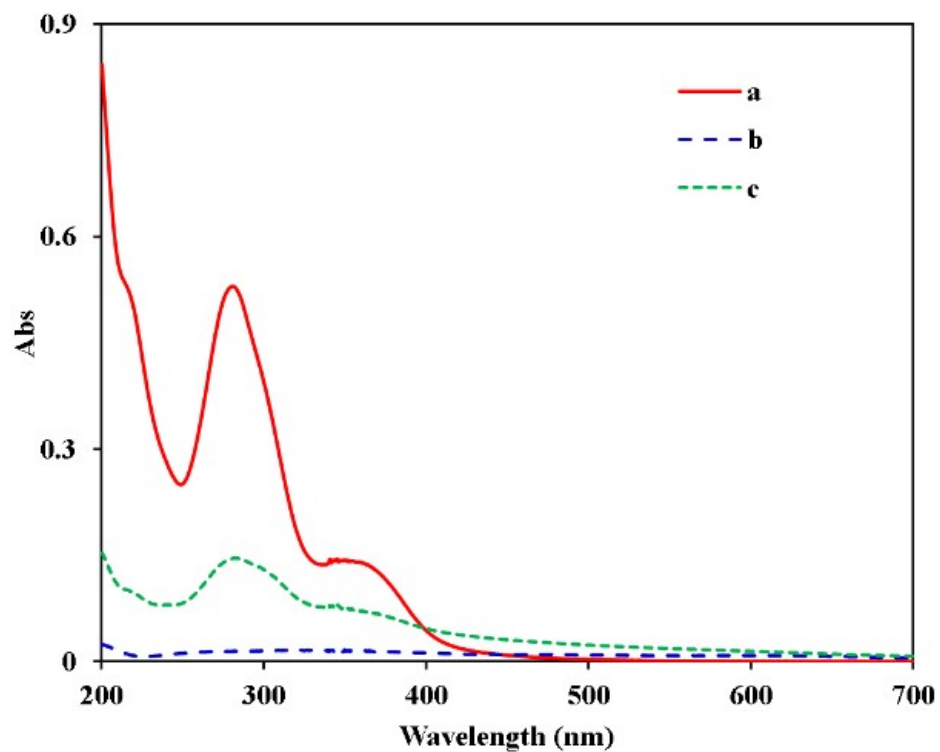

**Fig. S4.** Absorbance spectra of FA (a), RGOTrz (b) and FA-RGOTrz (c) in water.

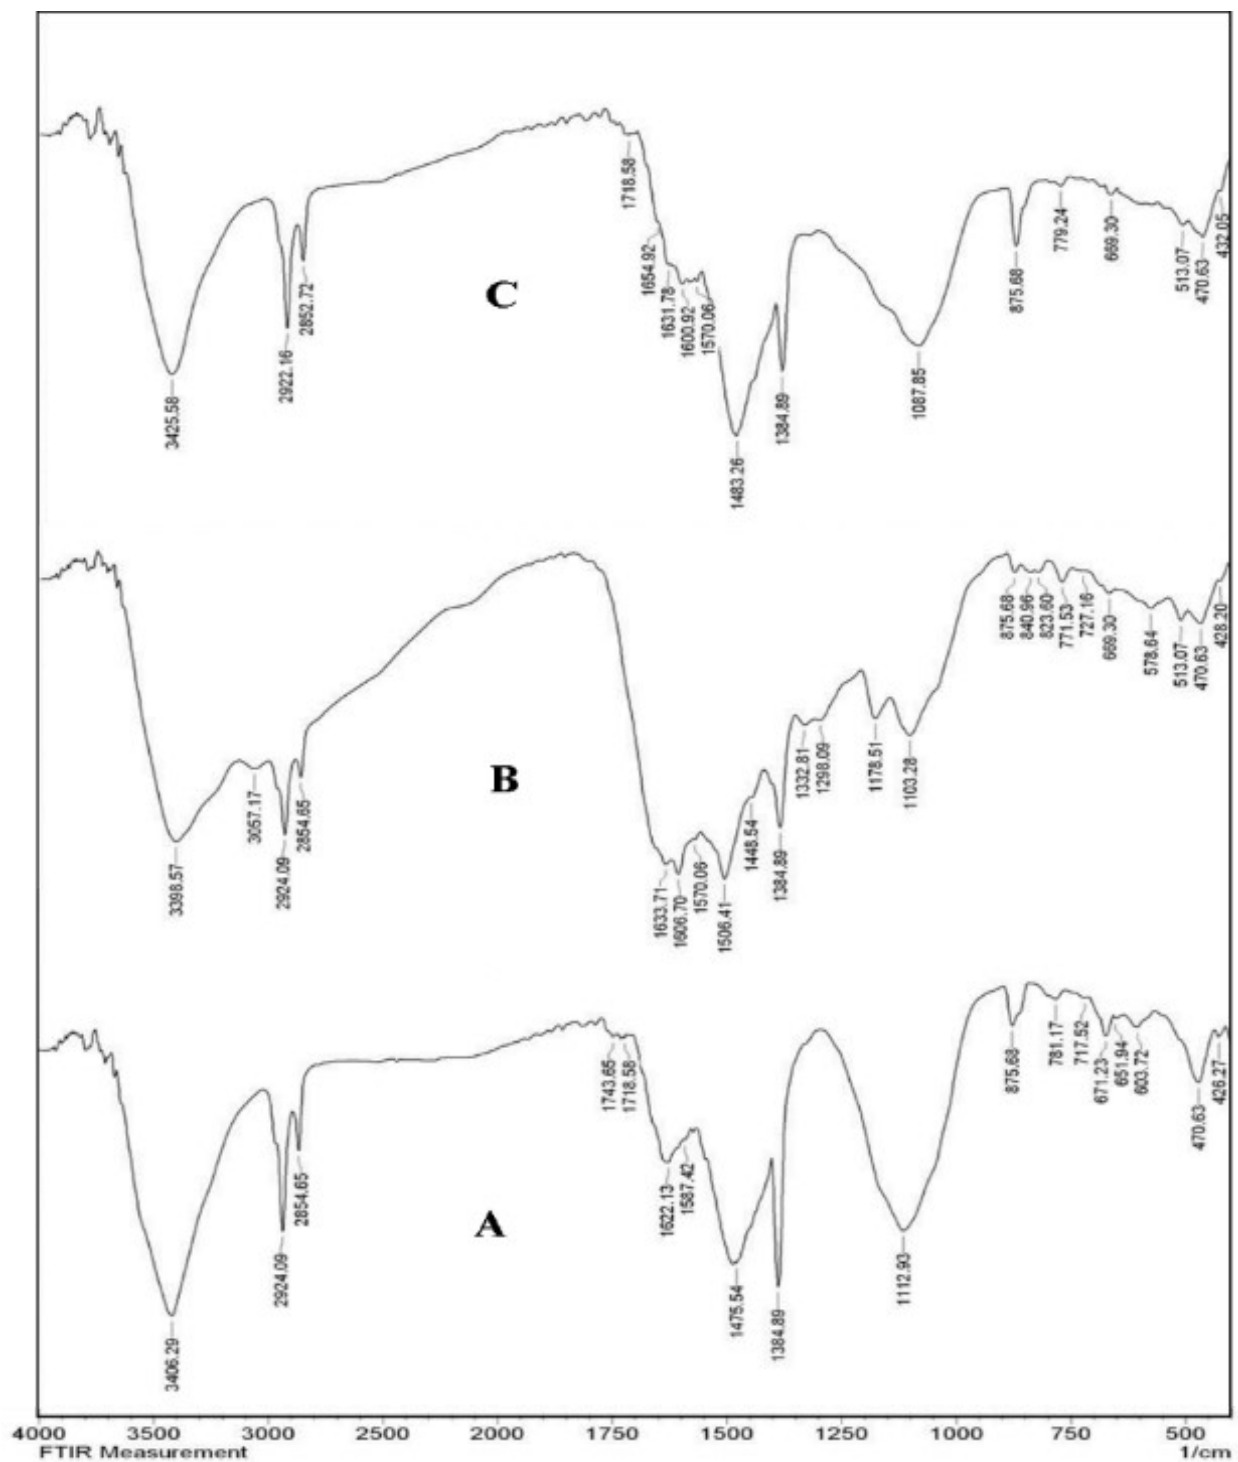

**Fig. S5.** FT-IR spectra of RGOTrz (A), FA (B) and FA-RGOTrz (C).
